# Supplementary material for: The development and validation of a Real Time Location System to reliably monitor everyday activities in natural contexts
Source: PLoS One. 2017 Feb 14;12(2):e0171610. doi: 10.1371/journal.pone.0171610 (PMC5308850; doi:10.1371/journal.pone.0171610)
Supplement: S2 Dataset — (XLSX) [file pone.0171610.s002.xlsx]

## Sheet: RTLS Output Household 2
Site	Date	Event	Filtered Start-time	Filtered End-time	Filtered Duration	Start-time	End-time	Duration	Zone/zones seen	Activity Percentage	Person	Activity Type
visonic-004	2011-12-05	0	18:42:27	18:55:53	806	18:42:27	18:55:53	806		1.32		Soap use
visonic-004	2011-12-05	1	18:42:27	18:55:53	806	18:42:27	18:55:53	806		1.2		Handwashing w/hotcold
											Person 2	Toilet use
											Person 2	Brush teeth
visonic-004	2011-12-05	2	22:57:14	22:57:17	3	22:57:01	22:57:22	21	bathroom sink (lf:44)	1	person 2 [001C43]	Soap use
visonic-004	2011-12-05	3	22:57:14	22:57:17	3	22:57:01	22:57:22	21	bathroom sink (lf:44)	0.8	person 2 [001C43]	Handwashing w/hotcold
											Person 1	Brush teeth
visonic-004	2011-12-05	5	23:35:15	23:36:00	45	23:35:09	23:36:00	50	bathroom toilet (lf:42)	1	person 1 [007DA3]	Toilet use (w/roll)
visonic-004	2011-12-05	4	23:35:50	23:36:07	16	23:35:50	23:36:44	53	bathroom sink (lf:44)	1	person 1 [007DA3]	Soap use
visonic-004	2011-12-05	6	23:35:50	23:36:07	16	23:35:50	23:36:44	53	bathroom sink (lf:44)	0.8	person 1 [007DA3]	Handwashing w/hotcold
											Person 1	Toilet use
											Person 1	Brush teeth
visonic-004	2011-12-06	7	07:28:42	07:28:47	4	07:28:42	07:28:51	9	bathroom sink (lf:44)	1	person 1 [007DA3]	Soap use
visonic-004	2011-12-06	8	07:28:42	07:28:47	4	07:28:42	07:28:51	9	bathroom sink (lf:44)	0.8	person 1 [007DA3]	Handwashing w/hotcold
visonic-004	2011-12-06	11	09:55:40	09:57:24	104	09:55:40	09:57:24	104	bathroom sink (lf:44)	0.75	person 2 [001C43]	HotCold Tap Use
visonic-004	2011-12-06	12	09:55:54	09:57:39	105	09:55:40	09:57:39	119	bathroom sink (lf:44)	1	person 2 [001C43]	Handwashing w/hotcold
visonic-004	2011-12-06	9	09:55:54	09:57:39	105	09:55:46	09:57:39	112	bathroom sink (lf:44)	1	person 2 [001C43]	Soap use
visonic-004	2011-12-06	13	09:56:11	09:56:40	28	09:55:46	09:56:40	53	bathroom sink (lf:44)	1	person 2 [001C43]	Toothpaste use
visonic-004	2011-12-06	10	09:56:11	09:56:40	28	09:55:46	09:56:40	53	bathroom sink (lf:44)	0.8	person 2 [001C43]	Toothbrushing (w/cup)
visonic-004	2011-12-06	14	21:03:18	21:03:22	3	21:03:07	21:04:16	68	bathroom sink (lf:44)	1	person 1 [007DA3]	Soap use
											Person 1	Toilet use
											Person 1	Brush teeth
visonic-004	2011-12-06	15	21:03:18	21:03:22	3	21:03:07	21:04:16	68	bathroom sink (lf:44)	0.8	person 1 [007DA3]	Handwashing w/hotcold
visonic-004	2011-12-06	16	21:05:44	21:05:47	3	21:05:44	21:05:52	7	bathroom sink (lf:44)	0.75	person 1 [007DA3]	HotCold Tap Use
											Person 1	Toilet use
visonic-004	2011-12-06	17	21:24:39	21:24:43	4	21:24:37	21:25:08	31	bathroom sink (lf:44)	1	person 1 [007DA3]	Soap use
visonic-004	2011-12-06	18	21:24:39	21:24:43	4	21:24:37	21:25:08	31	bathroom sink (lf:44)	0.8	person 1 [007DA3]	Handwashing w/hotcold
visonic-004	2011-12-06	19	23:10:54	23:10:58	4	23:10:51	23:11:05	14	bathroom sink (lf:44)	1	person 1 [007DA3]	Soap use
visonic-004	2011-12-06	20	23:10:54	23:10:58	4	23:10:51	23:11:05	14	bathroom sink (lf:44)	0.8	person 1 [007DA3]	Handwashing w/hotcold
											Person 1	Toilet use
visonic-004	2011-12-07	22	07:33:40	07:33:46	6	07:33:35	07:33:49	14	bathroom sink (lf:44)	0.8	person 1 [007DA3]	Handwashing w/hotcold
visonic-004	2011-12-07	21	07:33:40	07:33:46	6	07:33:35	07:33:49	14	bathroom sink (lf:44)	1	person 1 [007DA3]	Soap use
											Person 2	Toilet use
visonic-004	2011-12-07	24	07:50:47	07:54:20	213	07:50:46	07:54:20	214	bathroom sink (lf:44)	0.9	person 2 [001C43]	Toothbrushing (w/cup)
visonic-004	2011-12-07	23	07:52:56	07:53:10	13	07:50:46	07:53:15	148	bathroom sink (lf:44)	1.66	person 2 [001C43]	Soap use
visonic-004	2011-12-07	25	07:53:01	07:53:04	3	07:50:46	07:53:15	148	bathroom sink (lf:44)	0.75	person 2 [001C43]	HotCold Tap Use
visonic-004	2011-12-07	26	07:52:56	07:53:10	13	07:50:46	07:53:15	148	bathroom sink (lf:44)	1.5	person 2 [001C43]	Handwashing w/hotcold
visonic-004	2011-12-07	27	07:50:53	07:51:01	8	07:50:46	07:53:15	148	bathroom sink (lf:44)	1	person 2 [001C43]	Toothpaste use
						08:30:00					Person 1	Toilet use
						08:30:00					Person 1	Brush teeth
						08:30:00					Person 1	Soap use
visonic-004	2011-12-07	29	21:40:02	21:40:05	3	21:39:31	21:40:05	33	bathroom toilet (lf:42)	0.8	person 1 [007DA3]	Toilet use (w/roll)
visonic-004	2011-12-07	28	21:39:53	21:40:48	55	21:39:53	21:41:06	72	bathroom sink (lf:44)	1	person 1 [007DA3]	Soap use
visonic-004	2011-12-07	30	21:39:53	21:40:48	55	21:39:53	21:41:06	72	bathroom sink (lf:44)	0.8	person 1 [007DA3]	Handwashing w/hotcold
											Person 2	Toilet use
											Person 2	Brush teeth
visonic-004	2011-12-07	31	23:11:44	23:11:55	10	23:11:40	23:12:01	20	bathroom sink (lf:44)	1	person 2 [001C43]	Soap use
visonic-004	2011-12-07	32	23:11:44	23:11:55	10	23:11:40	23:12:01	20	bathroom sink (lf:44)	0.8	person 2 [001C43]	Handwashing w/hotcold
											Person 1	Toilet use
											Person 1	Brush teeth
											Person 1	Soap use
visonic-004	2011-12-07	33	23:21:04	23:21:07	3	23:20:39	23:21:22	42	bathroom sink (lf:44)	0.75	person 1 [007DA3]	HotCold Tap Use
											Person 1	Toilet use
visonic-004	2011-12-08	34	07:29:04	07:29:09	4	07:29:03	07:29:09	6	bathroom sink (lf:44)	1	person 1 [007DA3]	Soap use
visonic-004	2011-12-08	35	07:29:04	07:29:09	4	07:29:03	07:29:09	6	bathroom sink (lf:44)	0.8	person 1 [007DA3]	Handwashing w/hotcold
											Person 2	Toilet use
visonic-004	2011-12-08	36	07:58:03	07:58:17	14	07:58:03	07:58:17	14	bathroom sink (lf:44)	0.9	person 2 [001C43]	Toothbrushing (w/cup)
visonic-004	2011-12-08	38	07:58:08	07:58:17	8	07:58:03	07:58:17	13	bathroom sink (lf:44)	1	person 2 [001C43]	Toothpaste use
visonic-004	2011-12-08	37	07:58:04	07:58:08	4	07:58:03	07:58:17	13	bathroom sink (lf:44)	0.75	person 2 [001C43]	HotCold Tap Use
						08:15:00					Person 1	Brush teeth
											Person 2	Toilet use
											Person 2	Brush teeth
visonic-004	2011-12-09	40	07:48:43	07:48:50	7	07:46:02	07:48:50	167	bathroom sink (lf:44)	1	person 2 [001C43]	HotCold Tap Use
visonic-004	2011-12-09	39	07:47:52	07:48:30	38	07:46:02	07:48:30	147	bathroom sink (lf:44)	1	person 2 [001C43]	Soap use
visonic-004	2011-12-09	41	07:47:52	07:48:50	58	07:46:02	07:48:50	167	bathroom sink (lf:44)	1.2	person 2 [001C43]	Handwashing w/hotcold
visonic-004	2011-12-09	43	08:08:37	08:08:40	3	08:08:37	08:08:40	3	bathroom sink (lf:44)	0.8	person 2 [001C43]	Handwashing w/hotcold
visonic-004	2011-12-09	42	08:08:37	08:08:40	3	08:08:37	08:08:40	3	bathroom sink (lf:44)	1	person 2 [001C43]	Soap use
											Person 2	Toilet use
visonic-004	2011-12-10	45	11:14:45	11:16:08	82	11:14:45	11:16:21	96	bathroom sink (lf:44)	0.75	person 2 [001C43]	HotCold Tap Use
visonic-004	2011-12-10	44	11:16:10	11:16:21	11	11:16:00	11:16:21	20	bathroom sink (lf:44)	0.8	person 2 [001C43]	Toothbrushing (w/cup)
visonic-004	2011-12-10	46	11:16:10	11:16:21	11	11:16:00	11:16:21	20	bathroom sink (lf:44)	1	person 2 [001C43]	Toothpaste use
visonic-004	2011-12-10	47	11:17:14	11:17:33	19	11:16:51	11:17:33	41	bathroom sink (lf:44)	1	person 2 [001C43]	HotCold Tap Use
											Person 1	Toilet use
visonic-004	2011-12-11	48	18:21:23	18:21:28	4	18:21:23	18:21:28	4	bathroom sink (lf:44)	1	person 1 [007DA3]	Soap use
visonic-004	2011-12-11	49	18:21:23	18:21:28	4	18:21:23	18:21:28	4	bathroom sink (lf:44)	0.8	person 1 [007DA3]	Handwashing w/hotcold
											Person 1	Toilet use
											Person 1	Brush teeth
visonic-004	2011-12-11	50	22:32:42	22:32:47	4	22:32:42	22:33:02	20	bathroom sink (lf:44)	1	person 1 [007DA3]	Soap use
visonic-004	2011-12-11	52	22:32:42	22:32:54	12	22:32:42	22:33:02	20	bathroom sink (lf:44)	1	person 1 [007DA3]	Handwashing w/hotcold
visonic-004	2011-12-11	51	22:32:49	22:32:54	5	22:32:44	22:33:02	17	bathroom sink (lf:44)	0.75	person 1 [007DA3]	HotCold Tap Use
visonic-004	2011-12-11	53	22:33:57	22:34:00	3	22:33:57	22:34:14	17	bathroom sink (lf:44)	0.75	person 1 [007DA3]	HotCold Tap Use
visonic-004	2011-12-11	54	22:34:59	22:36:00	61	22:34:59	22:36:00	61	bathroom sink (lf:44)	0.75	person 1 [007DA3]	HotCold Tap Use
visonic-004	2011-12-12	56	07:22:27	07:22:34	6	07:22:27	07:22:48	21	bathroom sink (lf:44)	0.75	person 2 [001C43]	HotCold Tap Use
visonic-004	2011-12-12	55	07:22:34	07:22:49	14	07:22:28	07:22:49	20	bathroom sink (lf:44)	0.9	person 2 [001C43]	Toothbrushing (w/cup)
visonic-004	2011-12-12	57	07:22:36	07:22:49	12	07:22:28	07:22:49	20	bathroom sink (lf:44)	1	person 2 [001C43]	Toothpaste use
visonic-004	2011-12-12	59	07:52:33	07:52:37	4	07:52:14	07:52:37	23	bathroom toilet (lf:42)	0.8	person 1 [007DA3]	Toilet use (w/roll)
visonic-004	2011-12-12	58	07:52:22	07:52:27	5	07:52:22	07:52:37	15	bathroom sink (lf:44)	1	person 1 [007DA3]	Soap use
visonic-004	2011-12-12	60	07:52:22	07:52:27	5	07:52:22	07:52:37	15	bathroom sink (lf:44)	0.8	person 1 [007DA3]	Handwashing w/hotcold
visonic-004	2011-12-12	61	08:18:51	08:18:54	3	08:18:51	08:18:54	3	bathroom sink (lf:44)	0.75	person 1 [007DA3]	HotCold Tap Use
							21:30:00				Person 1	Toilet use
											Person 1	Soap use
							22:00:00				Person 2	Toilet use
											Person 2	Tap use
							22:50:19				Person 1	Brush teeth
visonic-004	2011-12-12	63	22:49:45	22:50:19	33	22:49:45	22:50:19	33	bathroom toilet (lf:42)	1	person 1 [007DA3]	Toilet use (w/roll)
visonic-004	2011-12-12	62	22:50:05	22:50:11	5	22:50:04	22:50:35	30	bathroom sink (lf:44)	1	person 1 [007DA3]	Soap use
visonic-004	2011-12-12	64	22:50:05	22:50:11	5	22:50:04	22:50:35	30	bathroom sink (lf:44)	0.8	person 1 [007DA3]	Handwashing w/hotcold
visonic-004	2011-12-13	66	07:24:05	07:24:14	8	07:23:43	07:24:14	31	bathroom toilet (lf:42)	0.8	person 1 [007DA3]	Toilet use (w/roll)
visonic-004	2011-12-13	67	07:23:58	07:24:04	6	07:23:55	07:24:17	22	bathroom sink (lf:44)	0.8	person 1 [007DA3]	Handwashing w/hotcold
visonic-004	2011-12-13	65	07:23:58	07:24:04	6	07:23:55	07:24:17	22	bathroom sink (lf:44)	1	person 1 [007DA3]	Soap use
							07:40:00				Person 2	Toilet use
											Person 2	Tap use
											Person 2	Brush teeth
							08:15:42				Person 1	Toilet use
											Person 1	Brush teeth
visonic-004	2011-12-13	68	08:15:38	08:15:42	4	08:15:17	08:15:42	24	bathroom sink (lf:44)	0.75	person 1 [007DA3]	HotCold Tap Use
visonic-004	2011-12-13	69	08:17:41	08:17:47	6	08:17:37	08:18:00	23	bathroom sink (lf:44)	1	person 1 [007DA3]	Soap use
visonic-004	2011-12-13	70	08:17:58	08:18:02	3	08:17:37	08:18:02	25	bathroom sink (lf:44)	0.75	person 1 [007DA3]	HotCold Tap Use
visonic-004	2011-12-13	71	08:17:41	08:18:02	20	08:17:37	08:18:02	25	bathroom sink (lf:44)	1	person 1 [007DA3]	Handwashing w/hotcold
							23:00:00				Person 2	Toilet use
											Person 2	Tap use
							23:21:57				Person 1	Toilet use
											Person 1	Brush teeth
visonic-004	2011-12-13	73	23:21:10	23:21:16	6	23:21:08	23:21:57	49	bathroom sink (lf:44)	0.8	person 1 [007DA3]	Handwashing w/hotcold
visonic-004	2011-12-13	72	23:21:10	23:21:16	6	23:21:08	23:21:57	49	bathroom sink (lf:44)	1	person 1 [007DA3]	Soap use
visonic-004	2011-12-13	74	23:24:09	23:24:36	26	23:24:09	23:24:36	26	bathroom sink (lf:44)	0.75	person 1 [007DA3]	HotCold Tap Use
visonic-004	2011-12-13	75	23:25:21	23:25:45	24	23:25:21	23:25:45	24	bathroom sink (lf:44)	0.75	person 1 [007DA3]	HotCold Tap Use
											Person 1	Toilet use
visonic-004	2011-12-14	76	07:29:11	07:29:15	4	07:29:09	07:29:15	6	bathroom sink (lf:44)	1	person 1 [007DA3]	Soap use
visonic-004	2011-12-14	77	07:29:11	07:29:15	4	07:29:09	07:29:15	6	bathroom sink (lf:44)	0.8	person 1 [007DA3]	Handwashing w/hotcold
visonic-004	2011-12-14	79	07:45:45	07:45:49	4	07:45:45	07:46:04	19	bathroom sink (lf:44)	0.75	person 2 [001C43]	HotCold Tap Use
visonic-004	2011-12-14	78	07:45:52	07:46:05	13	07:45:45	07:46:05	20	bathroom sink (lf:44)	0.8	person 2 [001C43]	Toothbrushing (w/cup)
visonic-004	2011-12-14	80	07:45:52	07:46:05	13	07:45:45	07:46:05	20	bathroom sink (lf:44)	1	person 2 [001C43]	Toothpaste use
visonic-004	2011-12-14	81	07:59:35	07:59:40	5	07:59:29	07:59:45	15	bathroom toilet (lf:42)	0.8	person 2 [001C43]	Toilet use (w/roll)
											Person 1	Brush teeth
visonic-004	2011-12-14	82	08:19:27	08:19:33	5	08:19:24	08:19:33	9	bathroom sink (lf:44)	1	person 1 [007DA3]	Soap use
visonic-004	2011-12-14	83	08:19:27	08:19:33	5	08:19:24	08:19:33	9	bathroom sink (lf:44)	0.8	person 1 [007DA3]	Handwashing w/hotcold
visonic-004	2011-12-14	84	08:21:06	08:21:09	3	08:20:50	08:21:09	19	bathroom sink (lf:44)	0.75	person 1 [007DA3]	HotCold Tap Use
											4 SETS OF ACTIVITIES MISSING
											Person 1	Brush teeth
visonic-004	2011-12-14	85	22:45:00	22:45:04	4	22:45:00	22:45:40	39	bathroom sink (lf:44)	1	person 1 [007DA3]	Soap use
visonic-004	2011-12-14	86	22:45:00	22:45:04	4	22:45:00	22:45:40	39	bathroom sink (lf:44)	0.8	person 1 [007DA3]	Handwashing w/hotcold
visonic-004	2011-12-14	87	22:46:54	22:46:57	3	22:46:54	22:47:29	35	bathroom sink (lf:44)	0.75	person 1 [007DA3]	HotCold Tap Use
visonic-004	2011-12-14	88	22:48:09	22:48:16	6	22:48:06	22:48:16	9	bathroom sink (lf:44)	0.75	person 1 [007DA3]	HotCold Tap Use
visonic-004	2011-12-14	89	22:48:52	22:49:05	12	22:48:52	22:49:05	12	bathroom sink (lf:44)	0.75	person 1 [007DA3]	HotCold Tap Use
visonic-004	2011-12-15	90	07:45:55	07:46:26	31	07:45:55	07:46:26	31	bathroom sink (lf:44)	0.9	person 2 [001C43]	Toothbrushing (w/cup)
visonic-004	2011-12-15	91	07:45:59	07:46:06	6	07:45:57	07:46:24	27	bathroom sink (lf:44)	0.75	person 2 [001C43]	HotCold Tap Use
visonic-004	2011-12-15	92	07:46:09	07:46:26	17	07:45:57	07:46:26	29	bathroom sink (lf:44)	1	person 2 [001C43]	Toothpaste use
											Person 1	Brush teeth
visonic-004	2011-12-15	94	08:14:47	08:15:07	19	08:14:47	08:15:22	34	bathroom sink (lf:44)	0.75	person 1 [007DA3]	HotCold Tap Use
visonic-004	2011-12-15	95	08:14:50	08:15:07	17	08:14:47	08:15:22	34	bathroom sink (lf:44)	1	person 1 [007DA3]	Handwashing w/hotcold
visonic-004	2011-12-15	93	08:14:50	08:14:57	6	08:14:48	08:15:22	33	bathroom sink (lf:44)	1	person 1 [007DA3]	Soap use

## Sheet: Ground Truth Household 2
Notes		Exciters:	Sink	lf:44		C=cold tap H=hot tap
			Toilet	lf:42		B=bar soap, L=liquid soap
Initial	Date	Time	Who else present?	Defecation	Urination	Tap Use	Soap use	Brush Teeth	Flossing	Shower	Other/notes
2	2011-12-05	22:55:00			1	C	B
1		23:35:00			1	C	L	1		1
1	2011-12-06	07:35:00			1	C	L	1		1	lenses etc
2		10:00:00				C		1			cream, deoderant
1		21:00:00			1	C	L	1			lenses etc
1		21:25:00		1		C	L
1	2011-12-07	07:40:00			1	C	L			1	lenses etc
2		07:40:00			1	C		1		1	crea, deoderant
1		08:30:00		1		C	L	1
1		21:40:00			1	C	L				lenses
2		23:00:00			1	C	B
1		23:20:00			1	C	L	1
1	2011-12-08	07:35:00			1	C	L			1	lenses etc
2		07:48:00			1	C		1		1	cream, deod
1		08:15:00				C		1
2	2011-12-09	07:40:00			1			1		1	dream, deod
2	2011-11-10	09:00:00			1	C	B	1
2		13:05:00								1	cream, deod
1	2011-12-11	16:20 (or might be 18:20)			1	C	L				lenses
1		around 10:30			1	HC	L	1			facewash etc
New sheet from here onwards
1	2011-12-12	21:30:00			1	C	L				facewash
2		22:00:00			1	C	B
1		23:00:00			1	C	L	1
1	2011-12-13	07:35:00			1	C	L			1	deod etc
2		07:40:00			1	C	B	1		1	cream, deod
1		08:10:00		1		C	L	1			lenses etc
1		08:25:00				C
2	2011-12-13	23:00:00			1	C	B
1		23:25:00			1	HC	L	1			lenses etc
1	2011-11-14	07:40:00			1	C	L			1	deod etc
2		07:45:00		1		C		1		1	deod, cream
1		08:15:00				C	L	1			lenses etc
2	2011-12-14	6:45/7:20			1	C	B	1		1	cream, deod			to do
1		08:00:00			1	C	L			1	lenses etc
1		08:15:00				C		1
1		08:10:00				C	L
1		22:45:00				HC	L	1			lenses etc
1	2011-12-15	07:40:00								1	deod etc
2		07:50:00				C		1		1	deod, cream
1		08:15:00				C	L	1			lenses etc
